# Supplementary material for: A Multidisciplinary Approach in Prenatal Diagnosis of TSC&nbsp;With Cardiac Rhabdomyoma as the Initial Symptom
Source: Research Square preprint supplement (doi:10.21203/rs.3.rs-96940/v1), 2020-11-02
Supplement: Supplementary file 1 [file 7a078c6f117f96362485456a.xlsx]

## Sheet: Sheet1
Summary of echocardiographic findings in fetus of CR
Number of tumors			n(%)
Solitary			18(29.5%)
Multiple			43(70.5%)
loaction of tumors
LV			46(75.4%)
RV			29(47.5%)
IVS			34(55.7%)
prenatal change in size and number
no record of alteration			12(/)
Progression			41(83.7%）
No change			7(14.3%)
Regression			1(2.0%)
postnatal change in size and number
lost following up			5(/)
Progression			0
No change			8(36.4%)
Regression			14(63.6%)
