# Supplementary material for: A Multidisciplinary Approach in Prenatal Diagnosis of TSC&nbsp;With Cardiac Rhabdomyoma as the Initial Symptom
Source: Research Square preprint supplement (doi:10.21203/rs.3.rs-96940/v1), 2020-11-02
Supplement: Supplementary file 2 [file 7d866bc0f133013c7b068a2a.xlsx]

## Sheet: Sheet1
Table 2. Characteristics of 61 cases with prenatally diagnosed cardiac rhabdomyoma (CR)
No.	age	GA	Number of CR	Location of CR	Max Diameter	change Intrauterine	Complication	MRI	Origin	Mutation	ACMG	Perinatal Outcome
p1	32	34	Multiple	LA RA LV RV	8.2	increase	TR	positive	de novo	TSC2	Likely pathogenic	TOP
p2	31	22	Multiple	LV RV	9.1	/	no	positive	parental	TSC1	VUS	#Fetal reduction
p3	20	35	Single	IVS	unknown	increase	no	negative	de novo	TSC1/2	VUS	Liveborn
p4	23	23	Multiple	LV IVS	17	increase	no	positive	de novo	TSC2	VUS	TOP
p5	27	26	Multiple	LV RV IVS	12	increase	no	positive	de novo	TSC2	Likely pathogenic	TOP
p6	34	16	Multiple	LV IVS	unknown	/	*mutiple cardiac structural abnormalities	/	maternal	TSC2	Likely pathogenic	TOP
p7	21	30	Multiple	RV	13.9	no change	no	negative	de novo	TCS2	VUS	Liveborn
p8	36	26	Multiple	LV RV	16.6	increase	no	positive	de novo	TSC2	VUS	TOP
p9	24	28	Single	LV	14	increase	no	negative	no	negative	/	Liveborn
p10	27	24	Multiple	LV RV	9.4	increase	partial LVOTO	negative	de novo	TSC2	Likely pathogenic	TOP
p11	25	22	Multiple	LV IVS	8.8	increase	no	positive	parental	TSC2	Likely pathogenic	TOP
p12	26	30	Single	LV	22	no change	no	negative	no	negative	/	Liveborn
p13	28	23	Single	LV	5.5	regression	Permanent left superior vena cava	negative	no	negative	/	Liveborn
p14	29	35	Multiple	LV RV IVS	10.2	increase	no	positive	de novo	TSC2	Likely pathogenic	TOP
p15	28	27	Single	LV(MV)	12	increase	no	negative	no	negative	/	Liveborn
p16	26	30	Multiple	LV IVS	10.3	increase	no	positive	de novo	TSC2	pathogenic	TOP
p17	25	24	Single	IVS	10.3	increase	partial RVOTO	negative	no	negative	/	Liveborn
p18	20	31	Multiple	LV RV IVS	23	no change	no	negative	parental	TSC2	VUS	Liveborn
p19	26	24	Single	IVS	9	/	no	negative	maternal	TSC2	VUS	Liveborn
p20	25	28	Multiple	LV IVS	15.5	increase	no	/	maternal	TSC2	Likely pathogenic	TOP
p21	19	34	Single	LV	32.2	no change	partial LVOTO	negative	no	negative	/	Liveborn
p22	28	24	Multiple	LV IVS	16.2	increase	LVOTO	negative	parental	TSC1	VUS	TOP
p23	26	32	Multiple	RV IVS	14	increase	no	positive	maternal	TSC2	Likely pathogenic	Liveborn
p24	33	24	Multiple	LV RV IVS	13.5	increase	no	positive	de novo	TSC2	Likely pathogenic	Liveborn
p25	29	26	Single	LV	28.1	/	pericardial effusion;peritoneal effusion	negative	no	negative	/	still birth
p26	33	23	Multiple	LV IVS	8	increase	no	negative	no	negative	/	Liveborn
p27	26	26	Single	IVS	10.8	increase	no	positive	de novo	TSC2	Likely pathogenic	Liveborn
p28	25	24	Multiple	LV RV	14	increase	partial LVOTO	positive	de novo	TSC2	pathogenic	TOP
p29	32	22	Multiple	LV RV IVS	9	increase	Renal pelvis separation	/	de novo	TSC2	Likely pathogenic	TOP
p30	32	23	Multiple	LV(MV) IVS	4.3	/	no	positive	de novo	TSC2	Likely pathogenic	TOP
p31	28	28	Single	IVS	14.1	/	no	positive	de novo	TSC2	Likely pathogenic	TOP
p32	21	25	Single	RV	12.9	increase	no	negative	no	negative	/	Liveborn
p33	34	22	Multiple	LV RV IVS	9	increase	no	/	de novo	TSC2	VUS	TOP
p34	32	23	Multiple	LV IVS	7.5	increase	no	/	de novo	TSC2	Likely pathogenic	TOP
p35	20	25	Multiple	LV RV	8	increase	no	negative	no	negative	/	Liveborn
p36	29	28	Multiple	LV RV IVS	12.7	increase	no	positive	no	negative	/	TOP
p37	22	24	Multiple	LV RV IVS	11	increase	no	negative	de novo	TSC2	VUS	Liveborn
p38	22	35	Multiple	LV RV	21.4	no change	TR;PH;right ventriculomegaly	positive	de novo	TSC2	Likely pathogenic	Liveborn
p39	31	28	Multiple	LV IVS	10.1	increase	pericardial effusion	negative	no	negative	/	Liveborn
p40	28	22	Multiple	LV RV IVS	13.3	increase	no	positive	de novo	TSC2	VUS	Liveborn
p41	40	24	Single	RV	9	increase	no	positive	de novo	TSC2	Likely pathogenic	TOP
p42	30	23	Multiple	LV IVS	8.6	/	no	/	de novo	TSC2	Likely pathogenic	TOP
p43	24	25	Single	LV(MV)	14	increase	no	negative	no	negative	/	Liveborn
p44	22	25	Multiple	LV IVS	8.8	/	no	positive	de novo	TSC2	Likely pathogenic	TOP
p45	32	28	Multiple	LV RV IVS	7.1	no change	no	positive	de novo&parental	TSC1/2	Likely pathogenic	TOP
p46	24	24	Multiple	LV	13.5	increase	no	positive	de novo	TSC2	pathogenic	TOP
p47	22	28	Multiple	LV RV IVS	8.2	/	no	positive	maternal	TSC1	Likely pathogenic	TOP
p48	28	24	Single	IVS	15.4	increase	no	negative	no	negative	/	Liveborn
p49	25	26	Multiple	LV	15	increase	no	/	de novo	TSC2	VUS	TOP
p50	36	25	Multiple	LV RV	9.5	increase	no	negative	parental	TSC2	Likely pathogenic	Liveborn
p51	36	30	Single	RV	14	no change	no	negative	no	negative	/	Liveborn
p52	31	32	Multiple	RV	14.3	increase	TR	positive	de novo	TSC2	VUS	TOP
p53	32	28	Multiple	LV RV	11.1	increase	no	positive	de novo	TSC2	Likely pathogenic	TOP
p54	23	25	Multiple	RV	9	/	no	negative	parental	TSC2	VUS	TOP
p55	29	28	Single	LV	5	increase	no	/	de novo	TSC2	Likely pathogenic	TOP
p56	32	24	Multiple	RV IVS	10	increase	no	negative	de novo	TSC1	Likely pathogenic	#Fetal reduction
p57	31	32	Multiple	LV IVS	18.9	increase	no	positive	de novo	TSC2	Likely pathogenic	Liveborn
p58	34	28	Single	IVS	10.1	increase	no	negative	parental	TSC2	VUS	Liveborn
p59	30	26	Multiple	LV	11.7	/	no	positive	no	negative	/	TOP
p60	17	20	Multiple	LV	11	/	LVOTO, peritoneal effusion, ABS	negative	maternal	TSC1	pathogenic	TOP
p61	27	22	Multiple	LV RV IVS	12.3	increase	right duplex kidney	negative	parental12%	TSC2	Likely pathogenic	Liveborn
*Associated with single ventricle, single atrium, common atrioventricular valve and permanent arterial trunk; #Associated with twin pregnancy, one is affected and the other is normal; LA, left atrium; RA, right atrium; LV, left ventricle; RV,right ventricle; IVS, interventricular septum; LVOTO, left ventricular outflow tract obstruction; RVITO, right ventricular inflow tract obstruction; TR,tricu…
